# Supplementary material for: Millennial-scale Land-surface Temperature and Soil Moisture Reconstruction Derived From Last Glacial European Loess Sequences
Source: Research Square preprint supplement (doi:10.21203/rs.3.rs-1280228/v1), 2022-02-02
Supplement: Supplementary file 1 [file 81c7756b667e9283f092aa0c.xlsx]

## Sheet: Schwabenberg RP1
Schwalbenberg RP1
Level	sample no within level	SU*	Lab. Code	Mass (µg C)	Radiocarbon date (BP)	SD	Source reference	Calibrated age** (cal BP)
(cm b.s.)						(1σ)		Min - Max (0.95)	Median
60-65	1	20	SacA 59923	1630	13520	40	This study	16127-16625	16358
60-65	2	20	GifA20336.1 / ECHo-3686 [a]	242	18010	150	This study	21426-22150	21842
60-65	3	20	GifA20336.2 / ECHo-3687 [a]	282	18270	130	This study
90-95	1	19	SacA-61519	1680	18470	50	This study	22327-22500	22416
90-95	2	19	ECHo-3676 [b]	1642	18760	60	This study
110-115	1	18	SacA-61520	1650	18600	50	This study	22424-22652	22510
135-140	1	17	SacA 59924	1650	18770	60	This study	22557-22846	22689
165-170	1	16	SacA-61521	1580	18830	60	This study	22793-23073	22923
185-190	1	15	SacA 59925	1670	19350	59	This study	23079-23663	23267
220-225	1	14	SacA 59926	1370	19880	60	This study	23863-24619	24123
255-260	1	12	SacA 59927	1310	26450	110	This study	30199-30970	30558
278-288	1	11	SacA 53220	800	27970	280	Fischer et al., 2021	31128-32018	31527
328-338	1	9	SacA 53221	900	29490	140	Fischer et al., 2021	31862-32931	32348
350-355	1	9	SacA 59928	1540	28350	130	This study	32562-33412	32946
358-368	1	9	SacA 53222	920	29040	300	Fischer et al., 2021	32922-33614	33257
365-370	1	8	SacA 59929	1400	28930	130	This study	33077-33703	33375
365-370	2	8	GifA20337.1 / ECHo-3684 [a]	286	28820	330	This study
395-400	1	7	SacA 59930	1400	29440	150	This study	33728-34310	34038
415-420	1	6	GifA20338.2 / ECHo-3682 [a]	262	30380	420	This study	34153-34749	34447
415-420	2	6	GifA20338.1 / ECHo-3683 [a]	318	29580	370	This study
428-438	1	6	SacA 53223	950	30480	230	Fischer et al., 2021	34453-35134	34756
455-460	1	5	SacA 59931	1370	30810	170	This study	34879-35675	35268
475-480	1	4	SacA-61522	1480	30820	170	This study	35298-36380	35871
490-495	1	3	SacA-61523	1410	33030	230	This study	36406-37473	37024
490-495	2	3	GifA20334 / ECHo-3680 [b]	1443	33050	230	This study
510-515	1	2	SacA 59933	1280	32580	200	This study	36826-38129	37388
530-535	1	1	SacA-61524	1440	32920	230	This study	37374-38873	38097
530-535	2	1	GifA20335 / ECHo-3681 [b]	1471	33160	230	This study
550-555	1	1	SacA 59934	1480	34240	250	This study	38162-39963	39316
* SU: Stratigraphical unit
Lab code: instrument and introduction mode: [a] EA-GIS ECHo-gas source, [b] ECHo-solid source
** Age model using BACON 2.2 software (Blaauw & Christeny, 2011) and IntCAL20 data set (Reimer et al., 2020)

## Sheet: Nussloch P8
Nussloch P8
Level	Horizons	Lab. Code	Radiocarbon date (BP)	SD	Source reference	Calibrated age* (cal BP)
(cm b.s.)				(1σ)		Min - Max (0.95)	Median
185-190	37c (IG8a)	SacA35802	18830	130	Moine et al., 2017	21577-22752	22478
285-290	35 (G7)	SacA 33526	19580	70	Moine et al., 2017	23029-23697	23421
460-465	33c (IG6b)	SacA 33529	20240	80	Moine et al., 2017	24320-24992	24646
500-505	33a (IG6a)	SacA 35803	20960	100	Moine et al., 2017	24681-25364	25109
675-680	30a-b (cpx IG5)	SacA 33527	21480	90	Moine et al., 2017	25944-26778	26463
705-710	30a-b (cpx IG5)	SacA 35804	22250	120	Moine et al., 2017	26467-27053	26826
735-740	28 (G4)	SacA 33530	22840	100	Moine et al., 2017	27050-27439	27227
750-755	28 (G4)	Poz-73516	23470	180	Moine et al., 2017	27275-27762	27470
845-850	26 (G3)	SacA 33528	24860	120	Moine et al., 2017	28312-29136	28834
1020-1025	23d (G2b)	Poz-73518	26250	240	Moine et al., 2017	30022-30664	30282
1025-1030	23d (G2b)	SacA 33520	25870	130	Moine et al., 2017	30061-30702	30320
1045-1050	23c (G2b)	SacA 33521	25930	120	Moine et al., 2017	30211-30859	30585
1055-1060	23c (G2b)	Poz-73511	25830	220	Moine et al., 2017	30308-31004	30714
1085-1090	23a (G2a)	Poz-73514	27220	260	Moine et al., 2017	30983-31599	31256
1095-1100	23a (G2a)	SacA 33522	27100	140	Moine et al., 2017	31152-31811	31483
1105-1110	23a (G2a)	Poz-73536	28370	290	Moine et al., 2017	31383-32430	31889
1160-1165	21c (G1b)	Poz-73515	28960	310	Moine et al., 2017	32941-33801	33368
1165-1170	21c (G1b)	SacA 33523	28880	180	Moine et al., 2017	33075-33950	33498
1190-1195	21a (G1a)	SacA 33532	29400	180	Moine et al., 2017	33906-35082	34289
1200-1205	20 (LS)	SacA 35805	31310	300	Moine et al., 2017	34461-35701	34967
1225-1230	20 (LS)	SacA 35806	31740	310	Moine et al., 2017	35636-37449	36345
1280-1285	18 (Gm3)	SacA 33531	36510	400	Moine et al., 2017	40151-41841	41247
1300-1305	18 (Gm3)	Poz-73535	38300	900	Moine et al., 2017	41352-42647	42143
1315-1320	18 (Gm3)	SacA 33517	39800	580	Moine et al., 2017	41906-43136	42617
1335-1340	17	Poz-73525	41500	1500	Moine et al., 2017	42338-43642	42982
1360-1365	16 (Gm2)	SacA 33518	39560	560	Moine et al., 2017	42776-44137	43422
1375-1380	16 (Gm2)	Poz-73528	41000	1500	Moine et al., 2017	42996-44520	43715
1390-1395	14 (UGS)	Poz-73529	43000	2000	Moine et al., 2017	43230-44869	43998
1525-1530	P4-2a-3 (Gm1)	SacA 33519	43340	890	Moine et al., 2017	45354-47862	46478
* Age model using BACON 2.2 software (Blaauw & Christeny, 2011) and IntCAL20 data set (Reimer et al., 2020)
